# Supplementary material
Source: publisher figshare collection journal article supplement (https://gsapubs.figshare.com/ndownloader/files/22741457)
Supplement: Supplementary file 1 [file 22741457]

GSA Data Repository Item # 7715

Title of article Early alkalic plutonism in the calc-alkalic batho-  
lithic belt of California

Author(s) Calvin Miller

see Geology v. 5, p. 685 - 688

Contents 1 page

Table 2 - Average Chemical Compositions of California

Monzonites  
\_\_\_\_\_  
\_\_\_\_\_  
\_\_\_\_\_  
\_\_\_\_\_  
\_\_\_\_\_  
\_\_\_\_\_  
\_\_\_\_\_  
\_\_\_\_\_

TABLE 2: AVERAGE CHEMICAL COMPOSITIONS OF CALIFORNIA MONZONITES

|                                                    | GRANITE<br>MOUNTAINS | SAN BERNARDINO<br>MOUNTAINS | INYO MOUNTAINS<br>(SILICA SATURATED) | INYO MOUNTAINS<br>(UNDERSATURATED) | SOUTHERN CALIF.<br>QTZ PLUTONITES <sup>a</sup> |
|----------------------------------------------------|----------------------|-----------------------------|--------------------------------------|------------------------------------|------------------------------------------------|
| n                                                  | 26                   | 24                          | 7                                    | 6                                  | 542                                            |
| SiO <sub>2</sub>                                   | 60.3                 | 60.5                        | 58.8                                 | 53.0                               | 67.0                                           |
| Al <sub>2</sub> O <sub>3</sub>                     | 19.4                 | 15.7                        | 17.6                                 | 17.4                               | 16.0                                           |
| Fe as Fe <sub>2</sub> O <sub>3</sub>               | 3.9                  | 6.6                         | 5.4                                  | 8.9                                | 3.9                                            |
| MgO                                                | 0.44                 | 2.5                         | 2.2                                  | 3.3                                | 1.8                                            |
| CaO                                                | 3.9                  | 5.2                         | 4.8                                  | 6.9                                | 4.1                                            |
| Na <sub>2</sub> O                                  | 5.1                  | 4.0                         | 4.5                                  | 5.0                                | 3.7                                            |
| K <sub>2</sub> O                                   | 5.3                  | 4.2                         | 4.7                                  | 3.6                                | 2.9                                            |
| TiO <sub>2</sub>                                   | 0.44                 | 0.60                        | 0.81                                 | 0.95                               | 0.59                                           |
| MnO                                                | 0.12                 | 0.13                        | 0.09                                 | 0.15                               | -                                              |
| P <sub>2</sub> O <sub>5</sub>                      | 0.14                 | 0.36                        | 0.43                                 | 0.75                               | 0.12                                           |
| Ignition Loss                                      | 0.38                 | 0.44                        | 0.45                                 | 0.10                               | -                                              |
| Total                                              | 99.42                | 100.23                      | 99.78                                | 100.05                             | 100.11                                         |
| Ba                                                 | 2600                 | 1200                        | 1800                                 | 1200                               |                                                |
| La                                                 | 40                   | 47                          | 56                                   | 38                                 |                                                |
| Sm                                                 | 6.7                  | 6.7                         | 7.3                                  | 6.6                                |                                                |
| Lu                                                 | 0.30                 | 0.38                        | 0.25                                 | 0.26                               |                                                |
| Rb                                                 | 130                  | 140                         | 140                                  | 120                                |                                                |
| Sr                                                 | 1400                 | 750                         | 1500                                 | 1500                               |                                                |
| (Sr <sup>87</sup> /Sr <sup>86</sup> ) <sub>i</sub> | (0.707)              | (0.709*)                    | (0.706)                              | (0.7055)                           |                                                |

Analyses for all elements except REE by XRF; REE determined by instrumental neutron activation analysis.

Precision and accuracy for individual analyses, determined by replicate analyses and analysis of international standards, is  $\pm 1-5\%$  of amount present for Si, Al, Fe, Ca, K, and Sr, and  $\pm 10\%$  for other elements (1 $\sigma$ ) (Ce and Nd, not listed in this table, are somewhat poorer).

Sr isotope ratios were obtained in the UCLA isotope laboratory; precisions for individual runs were  $\leq 0.0001$ . Initial ratios were determined by making the small corrections for growth over 175-230 m.y.; values are estimated to be accurate to  $\leq 0.0003$ , except for San Bernardino Mountains samples which were highly variable.

n = number of XRF analyses; n for REE = 4, 5, 3, and 4 respectively for the columns above, and 6, 4, 2, and 1 for the isotope values.

\* averaged from data of Baird and others (1974).
